# Supplementary material for: Responses of soil bacterial community structure to different artificially restored forests in open-pit coal mine dumps on the loess plateau, China
Source: PubMed Central journal article supplement (PMC10416249; doi:10.3389/fmicb.2023.1198313), 2023-07-28
Supplement: Data_Sheet_1.pdf [file Data_Sheet_1.pdf]

**Table S1** Relative abundance of dominant phyla in different forest types and ages.

| Forest type                         | Stand age | <i>Actinobacteriota</i> | <i>Proteobacteria</i> | <i>Acidobacteriota</i> | <i>Chloroflexi</i> |
|-------------------------------------|-----------|-------------------------|-----------------------|------------------------|--------------------|
| PT                                  | 10 years  | 21.63±0.646b            | 38.85±1.024a          | 12.04±0.528c           | 11.17±0.561b       |
|                                     | 20 years  | 32.29±0.499a            | 31.86±0.554b          | 14.02±0.197b           | 10.42±0.077b       |
|                                     | 30 years  | 32.56±1.335a            | 21.85±0.554c          | 19.59±0.611a           | 16.27±0.114a       |
| UP                                  | 10 years  | 30.82±1.355a            | 27.65±0.843a          | 15.83±0.794b           | 12.41±0.350b       |
|                                     | 20 years  | 30.45±0.928a            | 23.54±0.279b          | 22.10±0.679a           | 13.28±0.0443a      |
|                                     | 30 years  | 30.22±0.514a            | 23.43±0.283b          | 20.94±0.617a           | 13.78±0.179a       |
| Summary of ANOVA ( <i>P</i> values) |           |                         |                       |                        |                    |
| Forest type                         |           | 0.063                   | <0.001                | <0.001                 | 0.003              |
| Restoration age                     |           | <0.001                  | <0.001                | <0.001                 | <0.001             |
| Forest type x restoration age       |           | <0.001                  | <0.001                | <0.001                 | <0.001             |

Note: Values are mean±SE, n=5. Statistical significance was assessed by one-way ANOVA followed by LSD multiple comparison test. Different lowercase letters in the same column indicate significant difference ( $p < 0.05$ ).

**Table S2** Dissimilarity test of bacterial community structure for different forest types and ages.

| Forest type and restoration age | PERMANOVA      |                | ANOSIM |                | MRPP  |                |
|---------------------------------|----------------|----------------|--------|----------------|-------|----------------|
|                                 | R <sup>2</sup> | <i>p</i> value | R      | <i>p</i> value | R     | <i>p</i> value |
| PT all ages                     | 0.859          | <b>0.001</b>   | 1.00   | <b>0.001</b>   | 0.731 | <b>0.001</b>   |
| PT-10 vs PT-20                  | 0.894          | <b>0.016</b>   | 1.00   | <b>0.010</b>   | 0.626 | <b>0.008</b>   |
| PT-10 vs PT-30                  | 0.962          | <b>0.008</b>   | 1.00   | <b>0.009</b>   | 0.758 | <b>0.005</b>   |
| PT-20 vs PT-30                  | 0.882          | <b>0.010</b>   | 1.00   | <b>0.009</b>   | 0.604 | <b>0.011</b>   |
| UP all ages                     | 0.471          | <b>0.004</b>   | 0.78   | <b>0.001</b>   | 0.508 | <b>0.001</b>   |
| UP-10 vs UP-20                  | 0.813          | <b>0.009</b>   | 1.00   | <b>0.007</b>   | 0.526 | <b>0.009</b>   |
| UP-10 vs UP-30                  | 0.807          | <b>0.004</b>   | 1.00   | <b>0.012</b>   | 0.524 | <b>0.009</b>   |
| UP-20 vs UP-30                  | 0.335          | <b>0.039</b>   | 0.36   | <b>0.039</b>   | 0.145 | <b>0.046</b>   |

**Table S3** Monte Carlo permutation tests the relationships of bacterial community structure with soil factors.

| Soil factors                    | PT             |          | UP             |          |
|---------------------------------|----------------|----------|----------------|----------|
|                                 | R <sup>2</sup> | P value  | R <sup>2</sup> | P value  |
| SWC                             | 0.3165         | 0.105    | 0.7392         | 0.002**  |
| PH                              | 0.7736         | 0.001*** | 0.8623         | 0.001*** |
| TC                              | 0.5819         | 0.006**  | 0.9432         | 0.001*** |
| TN                              | 0.4056         | 0.041*   | 0.9491         | 0.001*** |
| TP                              | 0.684          | 0.001*** | 0.503          | 0.014*   |
| NO <sub>3</sub> <sup>-</sup> -N | 0.3516         | 0.066    | 0.9354         | 0.001*** |
| NH <sub>4</sub> <sup>+</sup> N  | 0.4366         | 0.037*   | 0.7243         | 0.002**  |
| AP                              | 0.6728         | 0.001*** | 0.6976         | 0.002**  |
| BD                              | 0.2618         | 0.178    | 0.489          | 0.016*   |

Note: \*\*\*  $p < 0.01$ ; \*\*  $p < 0.01$ ; \*  $p < 0.05$ .

**Table S4** The spearman correlations between diversity index of bacterial community structure with soil factors.

|         | SWC     | pH       | TC      | TN      | TP      | NO <sub>3</sub> <sup>-</sup> -N | NH <sub>4</sub> <sup>+</sup> -N | AP       | BD       |
|---------|---------|----------|---------|---------|---------|---------------------------------|---------------------------------|----------|----------|
| PT      |         |          |         |         |         |                                 |                                 |          |          |
| Shannon | 0.136   | -0.438   | 0.786** | 0.636*  | 0.132   | 0.764**                         | 0.764**                         | -0.850** | -0.071   |
| ACE     | 0.218   | -0.422   | 0.793** | 0.679** | 0.146   | 0.807**                         | 0.768**                         | -0.929** | -0.175   |
| Chao1   | 0.057   | -0.282   | 0.704** | 0.618*  | -0.071  | 0.754**                         | 0.693**                         | -0.871** | -0.007   |
| UP      |         |          |         |         |         |                                 |                                 |          |          |
| Shannon | 0.729** | -0.734** | 0.482   | 0.482   | 0.754** | 0.139                           | 0.704**                         | 0.718**  | -0.632*  |
| ACE     | 0.804** | -0.829** | 0.575*  | 0.671** | 0.854** | 0.096                           | 0.721**                         | 0.807**  | -0.779** |
| Chao1   | 0.768** | -0.788** | 0.607*  | 0.686** | 0.832** | 0.021                           | 0.650**                         | 0.743**  | -0.743** |

Note: \*\*\*  $p < 0.01$ ; \*\*  $p < 0.01$ ; \*  $p < 0.05$ .
